# Supplementary material for: Establishment of a modified percutaneous CT-guided paraspinal intramuscular VX-2 squamous cell carcinoma dual tumor model in rabbits
Source: PeerJ. 2021 May 28;9:e11536. doi: 10.7717/peerj.11536 (PMC8166237; doi:10.7717/peerj.11536)
Supplement: Supplemental Information 2 [file peerj-09-11536-s002.xlsx]

## Sheet: Surgical Resection
Tumor size at 7 days (mm)
Group A	Side	Group B	Side	Group C	Side
23.9	Left	11.7	Left	16.5	Left
15.1	Left	16.1	Left	11.7	Left
19.1	Left	16	Left	13.2	Left
20.9	Left	10.7	Left	16.1	Left
13.3	Left	12.1	Left	13.1	Left
20.1	Left	15.1	Left	15.3	Left
13.5	Left	11.4	Left	14.7	Left
16.6	Left	8.74	Left	10.5	Left
9.42	Left	10.7	Left	13.9	Left
16.6	Left	10.8	Left	16.5	Left
18.9	Right	12.8	Right	12.7	Right
27.9	Right	12	Right	10.7	Right
14.6	Right	12.4	Right	11.9	Right
14.9	Right	7.3	Right	13.4	Right
19.6	Right	11.3	Right	12.9	Right
21.5	Right	12.5	Right	14.3	Right
11.1	Right	15.5	Right	13.6	Right
8.9	Right	12.8	Right	12.7	Right
11.6	Right	12.6	Right	13.8	Right
14.4	Right	0	Right	16.2	Right
